# Supplementary material for: Effect of extracts from eggs of Helix aspersa maxima and Helix aspersa aspersa snails on Caco-2 colon cancer cells
Source: PeerJ journal article supplement (doi:10.7717/peerj.13217), 2022-04-12
Supplement: Gel_images_Figure_1_Revised.pdf [file Gel_images_Figure_1_Revised.pdf]

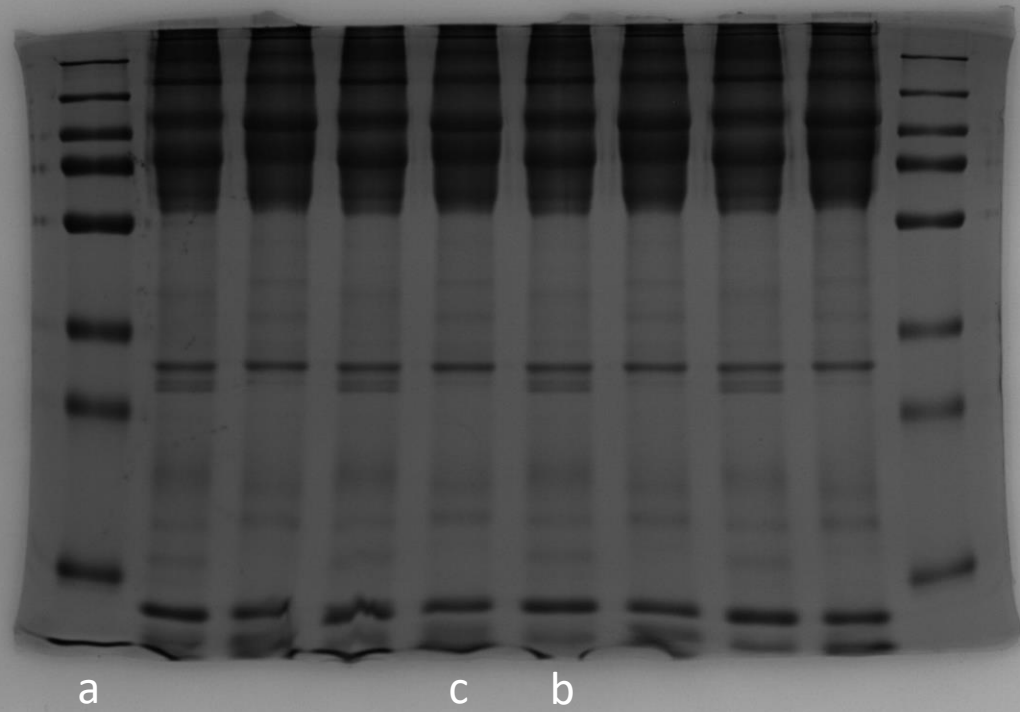

Figure 1A

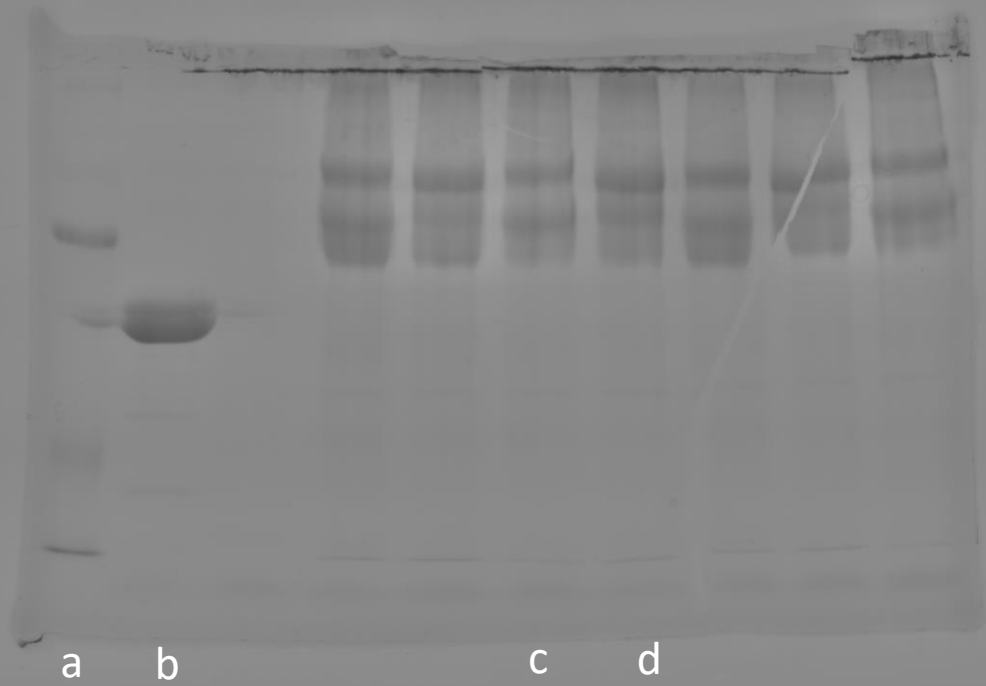

Figure 1B
